# Supplementary material for: Kidney-Protector Lipidic Cilastatin Derivatives as Structure-Directing Agents for the Synthesis of Mesoporous Silica Nanoparticles for Drug Delivery
Source: MDPI journal article supplement (doi:10.3390/ijms22157968), 2021-07-26
Supplement: s1 [file s1]

# Kidney-Protector Lipidic Cilastatin Derivatives as Drug-Structure-Directing Agents for the Synthesis of MSNs Drug Delivery Systems

## Supporting Information

### Characterization of the anionic DSDAs of cilastatin

#### Cilastatin-C10

**<sup>1</sup>H NMR (DMSO-d<sub>6</sub>):** δ 12.41 (s, 2H); 9.11 (s, 1H); 8.13 (d, 1H, J = 7.2 Hz); 6.33 (t, 1H, J = 7.2 Hz); 4.36 (m, 1H); 2.87 (dd, 1H, J = 13.3, 4.5 Hz); 2.69 (dd, 1H, J = 13.3, 4.5 Hz); 2.50 (t, 2H, J = 7.9 Hz); 2.18-2.02 (m, 4H); 1.61 (m, 1H); 1.46 (m, 6H); 1.24 (s, 12H); 1.10 (m, 6H); 0.85 (t, 3H, J = 7.9 Hz); 0.69 (m, 1H).  
**<sup>13</sup>C RMN (DMSO-d<sub>6</sub>):** δ 175.3, 173.0, 170.3, 166.5, 135.8, 129.0, 52.6, 35.7, 33.6, 32.0, 29.6, 29.5, 29.4, 29.3, 29.2, 28.3, 27.5, 27.4, 25.9, 22.8, 21.7, 20.2, 19.2, 14.6. **ESI MS [M+H]<sup>+</sup> = 513.1.**

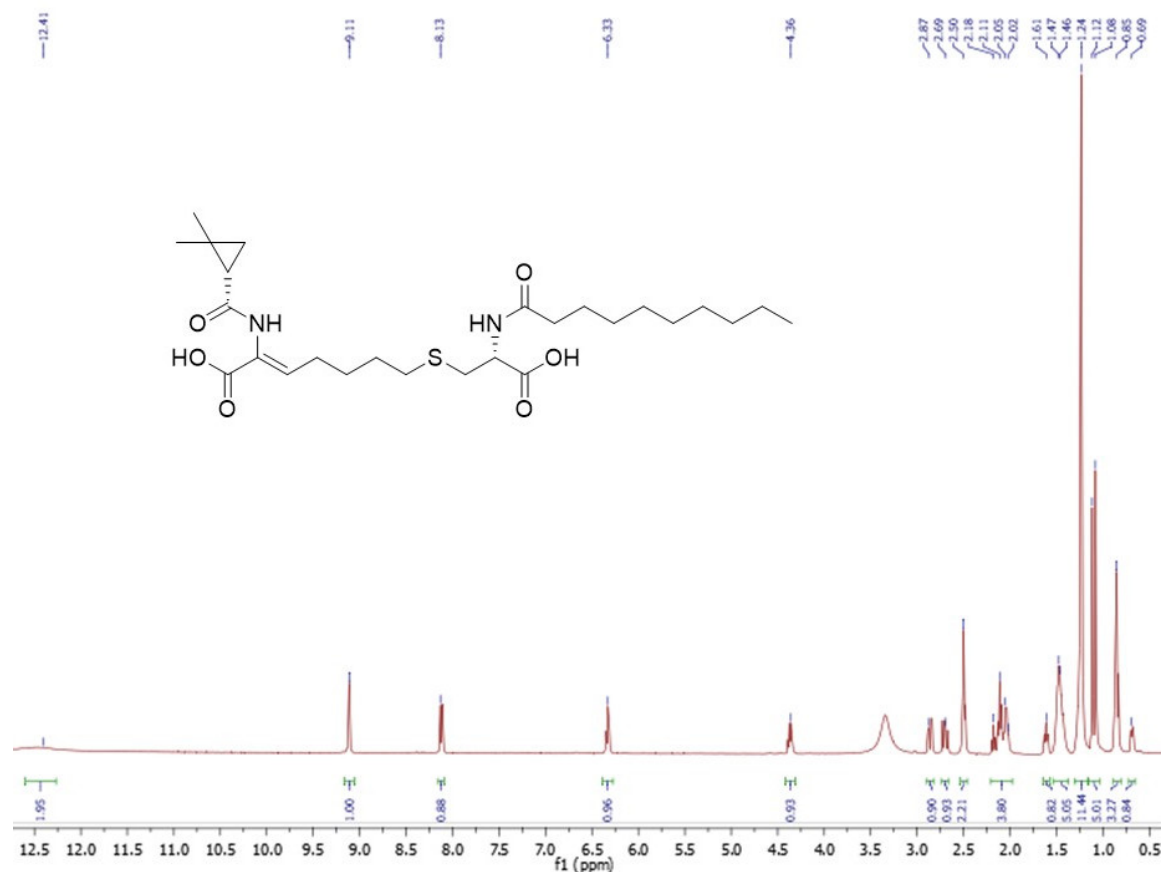

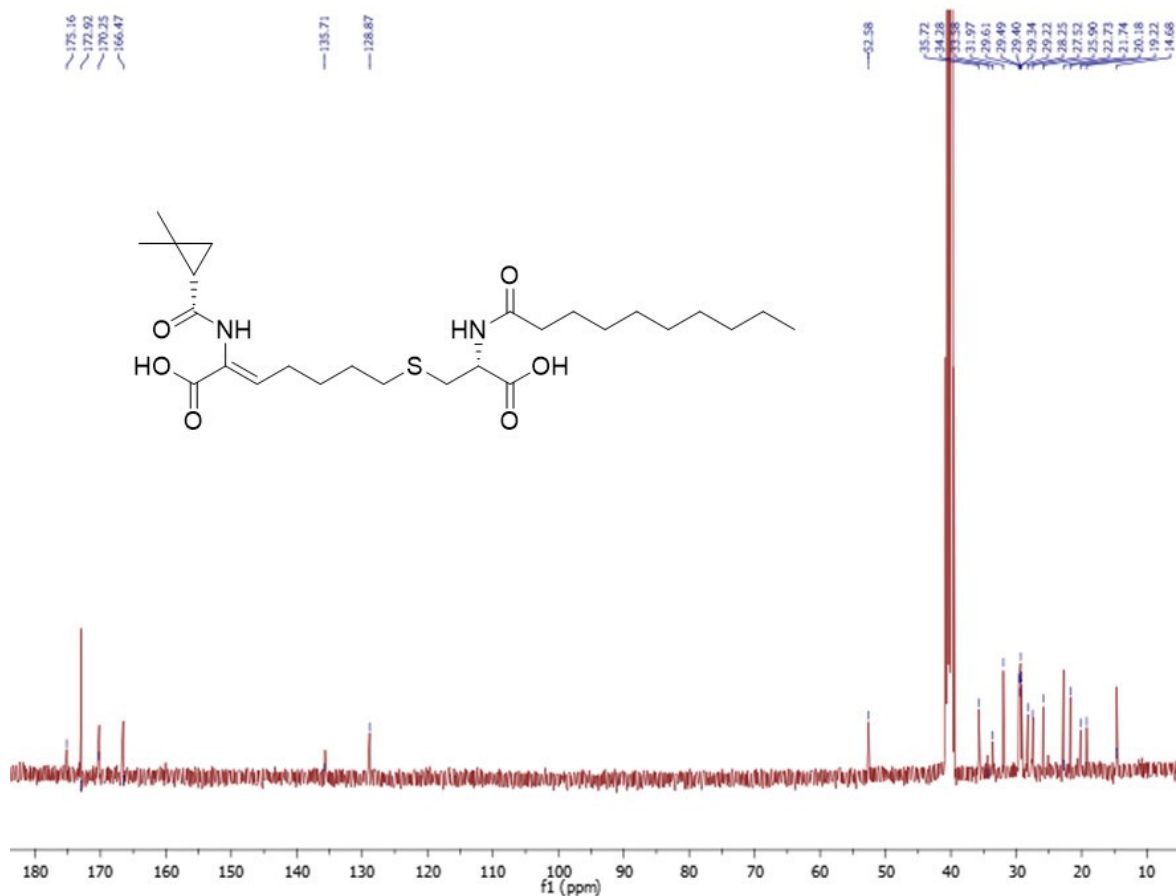

**Figure S1.** <sup>1</sup>H NMR and <sup>13</sup>C NMR spectra of the DSDA cilastatin-C10 in DMSO-*d*<sub>6</sub>.

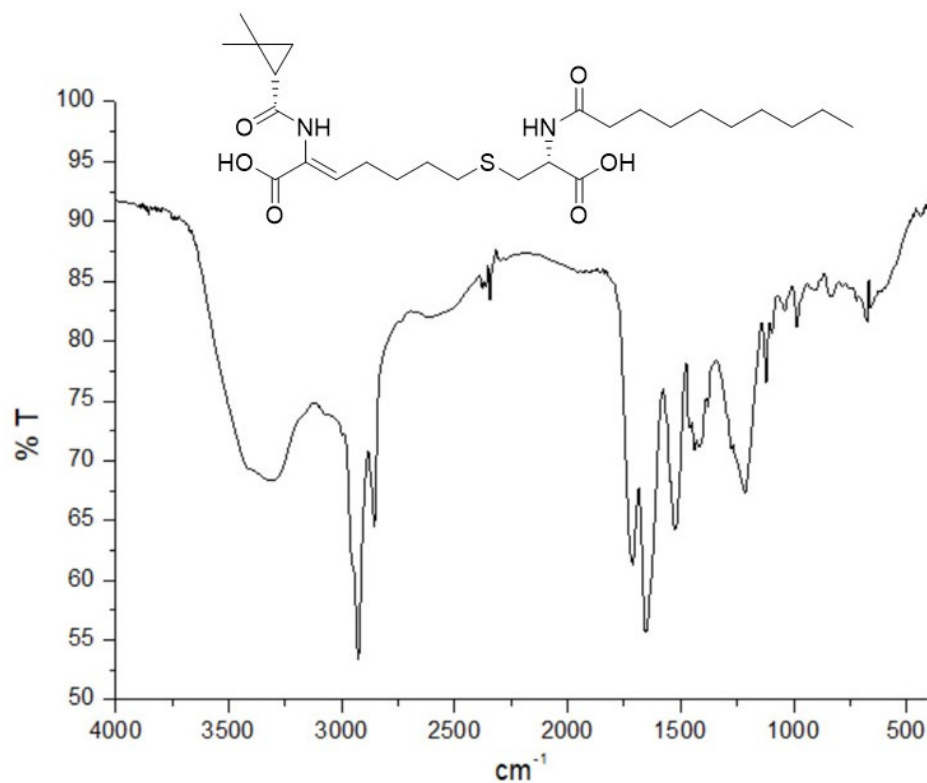

**Figure S2.** FTIR measurements of the DSDA cilastatin-C10.

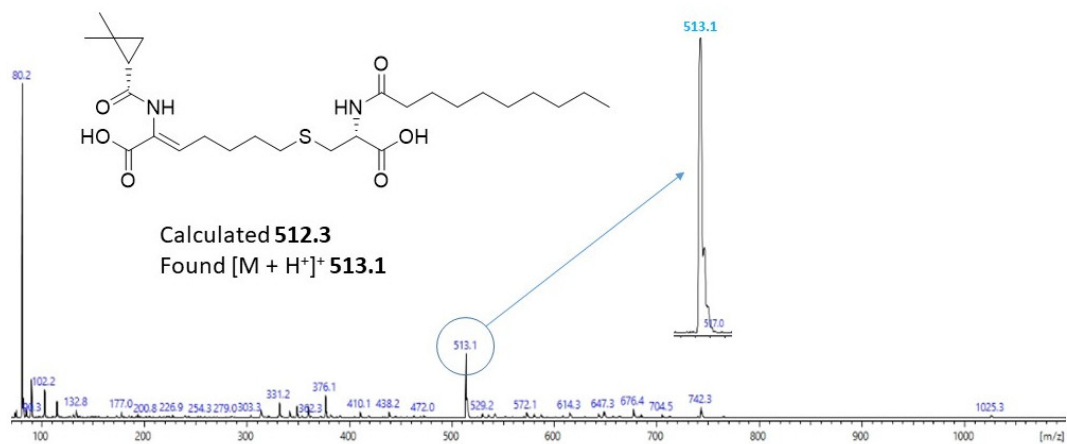

**Figure S3.** ESI-Mass spectrum of the DSDA cilastatin-C10.

**Cilastatin-C18**

**$^1\text{H}$  NMR (DMSO- $d_6$ ):**  $\delta$  9.11 (s, 1H); 8.08 (d, 1H,  $J = 7.9$  Hz); 6.33 (t, 1H,  $J = 7.2$  Hz); 5.32 (m, 2H); 4.36 (m, 1H); 2.86 (dd, 1H,  $J = 13.3, 4.5$  Hz); 2.70 (dd, 1H,  $J = 13.3, 4.5$  Hz); 2.15 (t, 2H,  $J = 7.9$  Hz); 2.09 (m, 2H); 2.01 (m, 2H) 1.97 (m, 6H); 1.60 (t, 2H,  $J = 7.9$  Hz); 1.44 (d, 1H,  $J = 7.9$  Hz); 1.24 (s, 24H); 1.06 (m, 6H); 0.83 (t, 3H,  $J = 7.9$  Hz); 0.67 (m, 1H).  **$^{13}\text{C}$  RMN (DMSO- $d_6$ ):**  $\delta$  174.5, 172.3, 169.5, 165.9, 134.9, 129.6, 128.3, 52.0, 35.1, 33.7, 33.0, 31.3, 29.1, 28.8, 28.7, 28.6, 27.6, 26.6, 25.2, 22.1, 21.0, 19.9, 18.5, 13.9. **ESI MS  $[\text{M}+\text{H}]^+ = 623.4$ .**

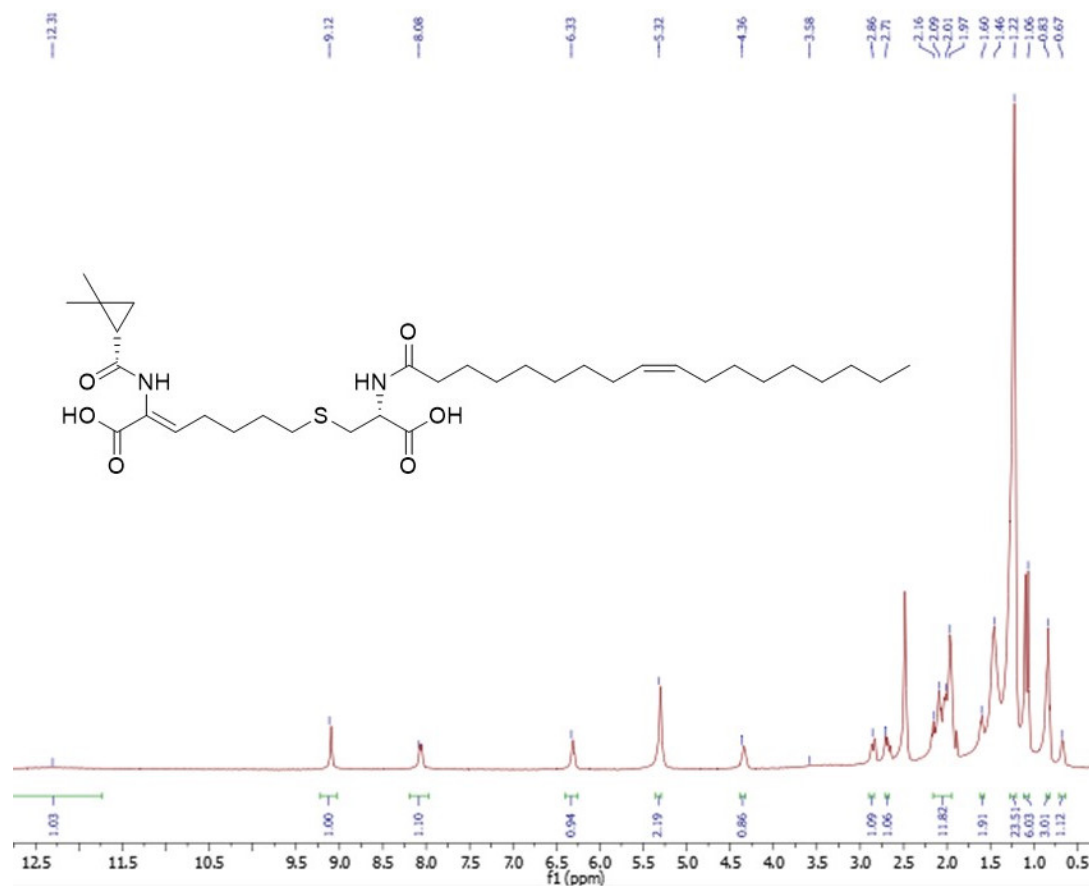

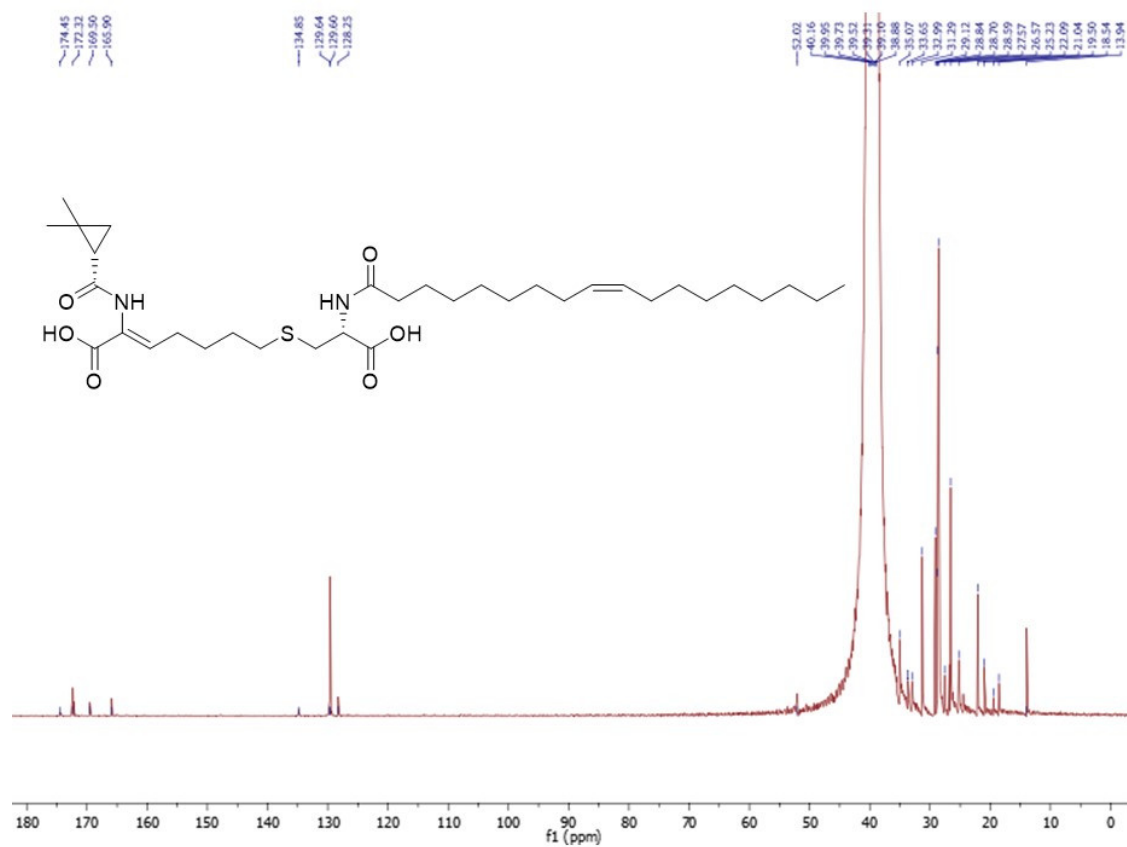

**Figure S4.** <sup>1</sup>H NMR and <sup>13</sup>C NMR spectra of the DSDA cilastatin-C18 in DMSO-*d*<sub>6</sub>.

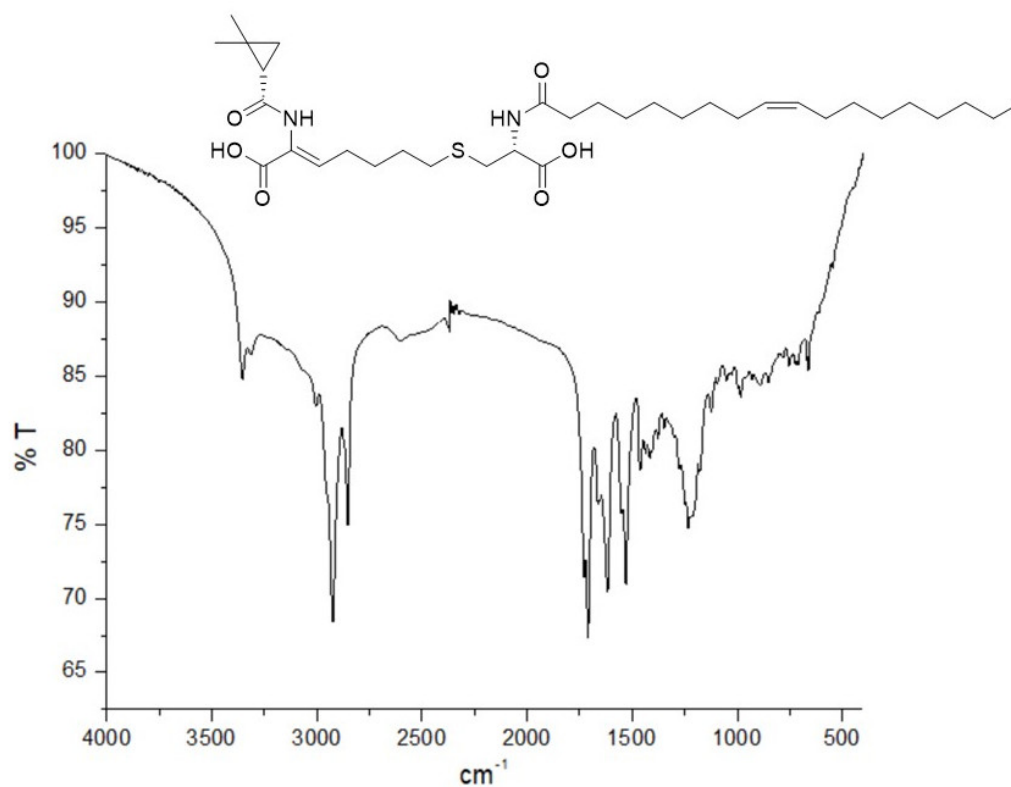

**Figure S5.** FTIR measurements of the DSDA cilastatin-C18.

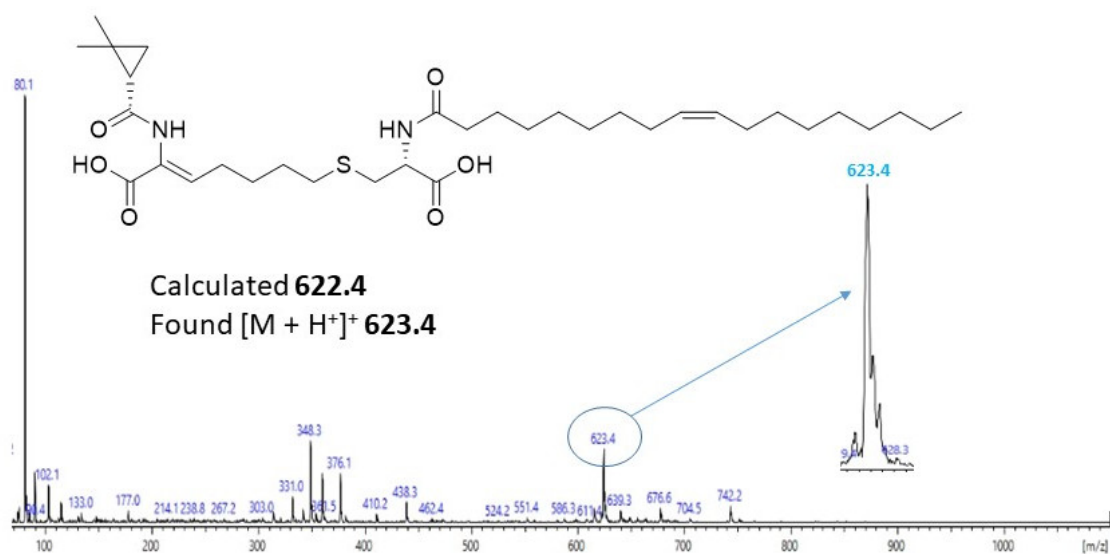

**Figure S6.** ESI-Mass spectrum of the DSDA cilastatin-C18.

## **Characterization of mesoporous silica nanoparticles with DSDAs of cilastatin (cilastatin@MSNs):**

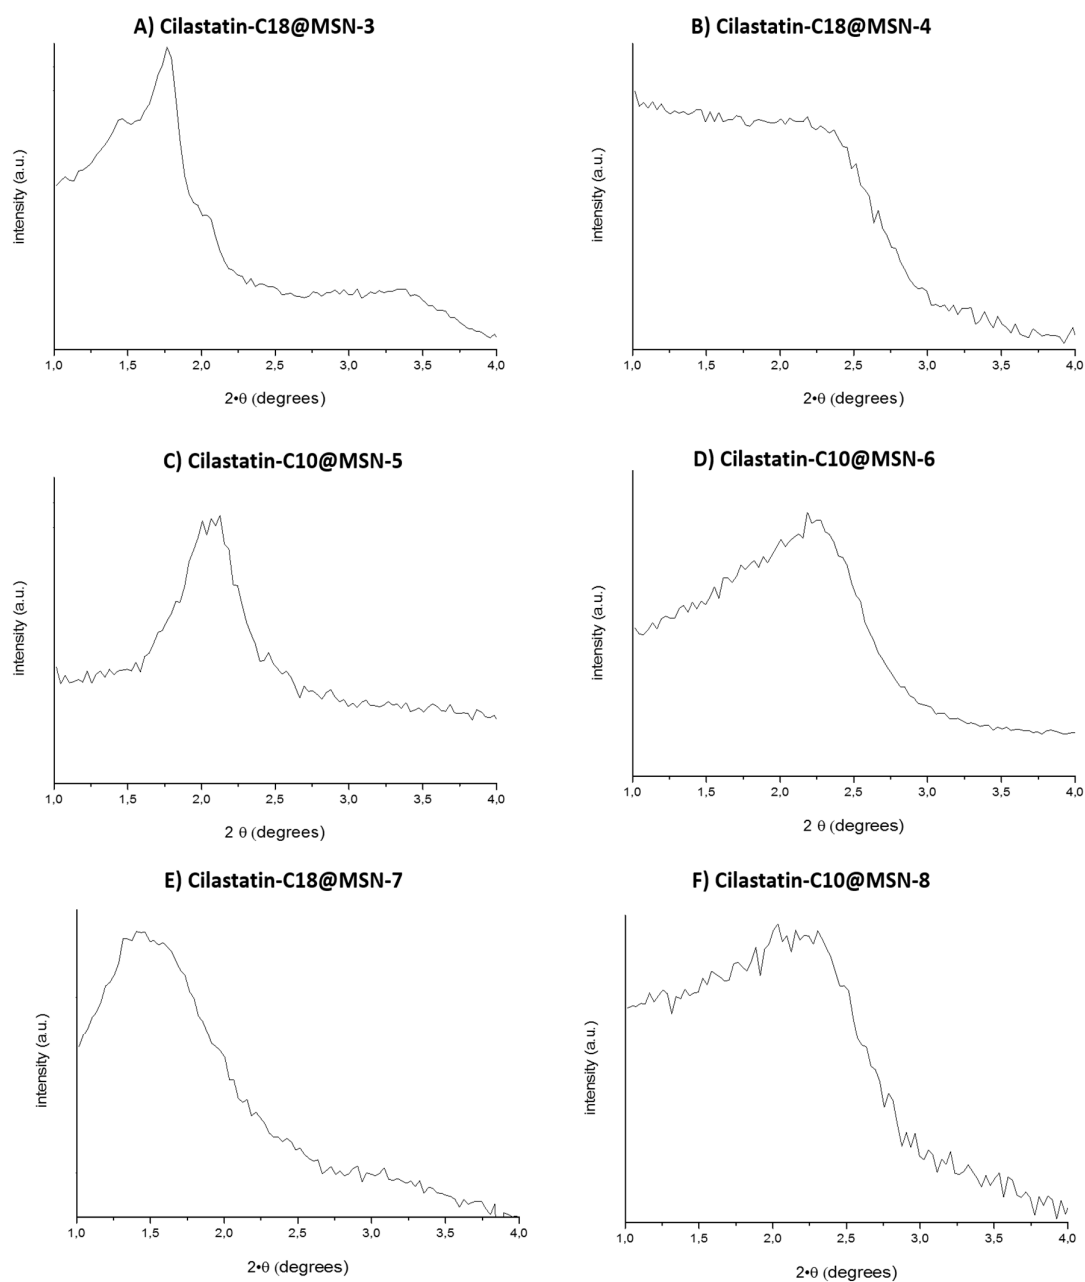

**Figure S7.** Low-angle X-ray diffraction patterns of cilastatin@MSNs. A) cilastatin-C18@MSN-3, B) cilastatin-C18@MSN-4, C) cilastatin-C10@MSN-5, D) cilastatin-C10@MSN-6, E) cilastatin-C18@MSN-7, F) cilastatin-C10@MSN-8.

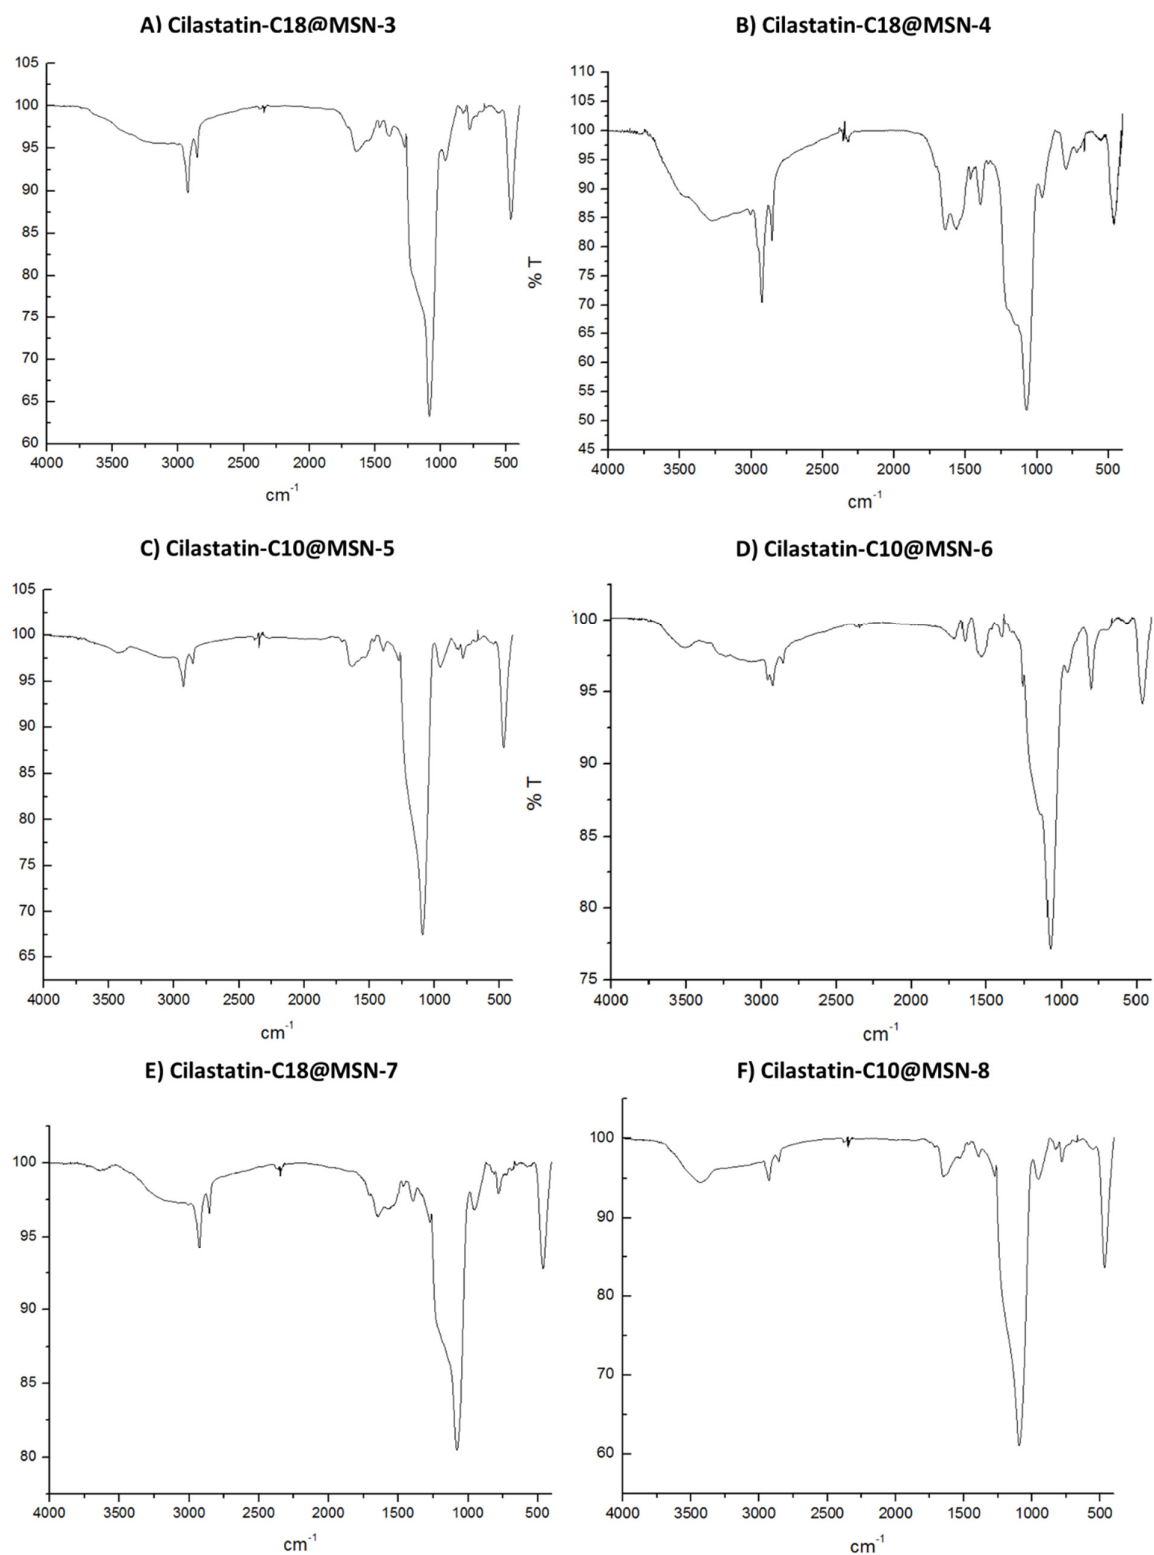

**Figure S8.** FTIR measurements of cilastatin@MSNs. A) cilastatin-C18@MSN-3, B) cilastatin-C18@MSN-4, C) cilastatin-C10@MSN-5, D) cilastatin-C10@MSN-6, E) cilastatin-C18@MSN-7, F) cilastatin-C10@MSN-8.



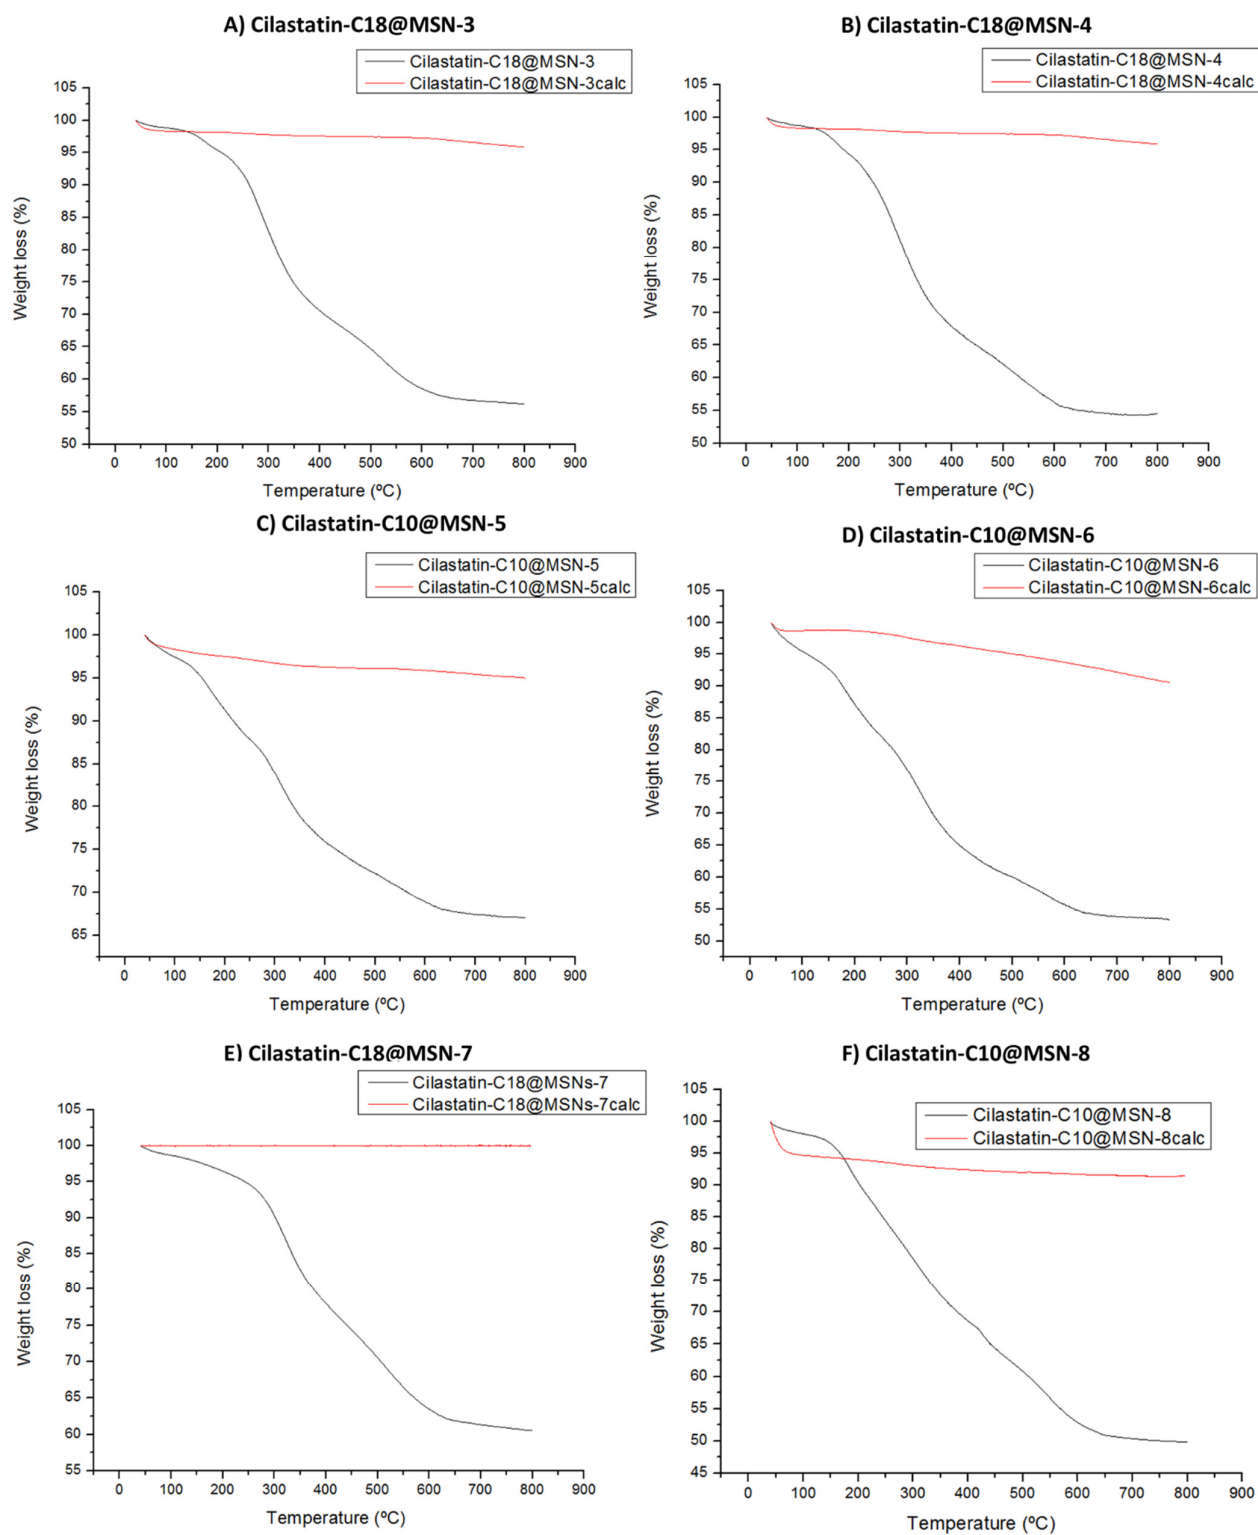

**Figure S9.** Thermogravimetric analysis of cilastatin@MSNs. A) cilastatin-C18@MSN-3, B) cilastatin-C18@MSN-4, C) cilastatin-C10@MSN-5, D) cilastatin-C10@MSN-6, E) cilastatin-C18@MSN-7, F) cilastatin-C10@MSN-8.

**Table S1.** Fitting parameters obtained by mathematical fitting of the cumulative release profiles of DSDA from cilastatin-C18@MSN-3 and cilastatin-C10@MSN-8 using Higuchi and Korsmeyer-Peppas drug release models.

| Material             | Korsmeyer-Peppas Model<br>$f(t) = k_{KP} \cdot t^n$ |                 |       | Higuchi Model<br>$f(t) = k_H \cdot t^{1/2}$ |       |
|----------------------|-----------------------------------------------------|-----------------|-------|---------------------------------------------|-------|
|                      | $K_{KP}$                                            | n               | $R^2$ | $K_H$                                       | $R^2$ |
| Cilastatin-C18@MSN-3 | $2.35 \pm 0.6$                                      | $0.75 \pm 0.04$ | 0.98  | $7.12 \pm 0.48$                             | 0.96  |
| Cilastatin-C10@MSN-8 | $41.27 \pm 0.6$                                     | $0.14 \pm 0.04$ | 0.86  | $2.84 \pm 1.00$                             | 0.61  |
